# Supplementary material
Source: Royal Society of Chemistry journal article supplement (doi:10.1039/d6tb00283h)
Supplement: d6tb00283h1.pdf [file d6tb00283h1.pdf]

1

Supporting Information for

2 Sequential supramolecular assembly of tannic acid  
3 and phenylboronic acid copolymers enabling  
4 enhanced cancer immunotherapy

5

6 Anudari Batbayar <sup>a,b</sup>, Ryotaro Ohashi <sup>a,b</sup>, Yuto Honda <sup>\*a,b,c</sup>, Haochen Guo <sup>c</sup>, Makoto Matsui <sup>b</sup>,  
7 Takahiro Nomoto <sup>a,d</sup>, Yutaka Miura <sup>a,b</sup> and Nobuhiro Nishiyama <sup>\*a,b,c</sup>

8

9

10 <sup>a</sup> Laboratory for Chemistry and Life Science, Institute of Integrated Research, Institute of  
11 Science Tokyo, 4259 Nagatsuta-cho, Midori-ku, Yokohama, Kanagawa, 226-8501, Japan.

12 <sup>b</sup> Department of Life Science and Technology, School of Life Science and Technology, Institute  
13 of Science Tokyo, 4259 Nagatsuta-cho, Midori-ku, Yokohama, Kanagawa, 226-8501, Japan.

14 <sup>c</sup> Innovation Center of Nanomedicine (iCONM), Kawasaki Institute of Industrial Promotion, 3-  
15 25-14 Tonomachi, Kawasaki-ku, Kawasaki, Kanagawa, 210-0821, Japan.

16 <sup>d</sup> Department of Life Sciences, Graduate School of Arts and Sciences, The University of Tokyo,  
17 3-8-1 Komaba, Meguro-ku, Tokyo 153-8902, Japan.

18

19

20 \*Correspondence should be addressed: honda.y.aj@m.titech.ac.jp (Y. H.),  
21 nishiyama.n.ad@m.titech.ac.jp (N. N.)

22

23

24

25

## 1 Supplementary Scheme:

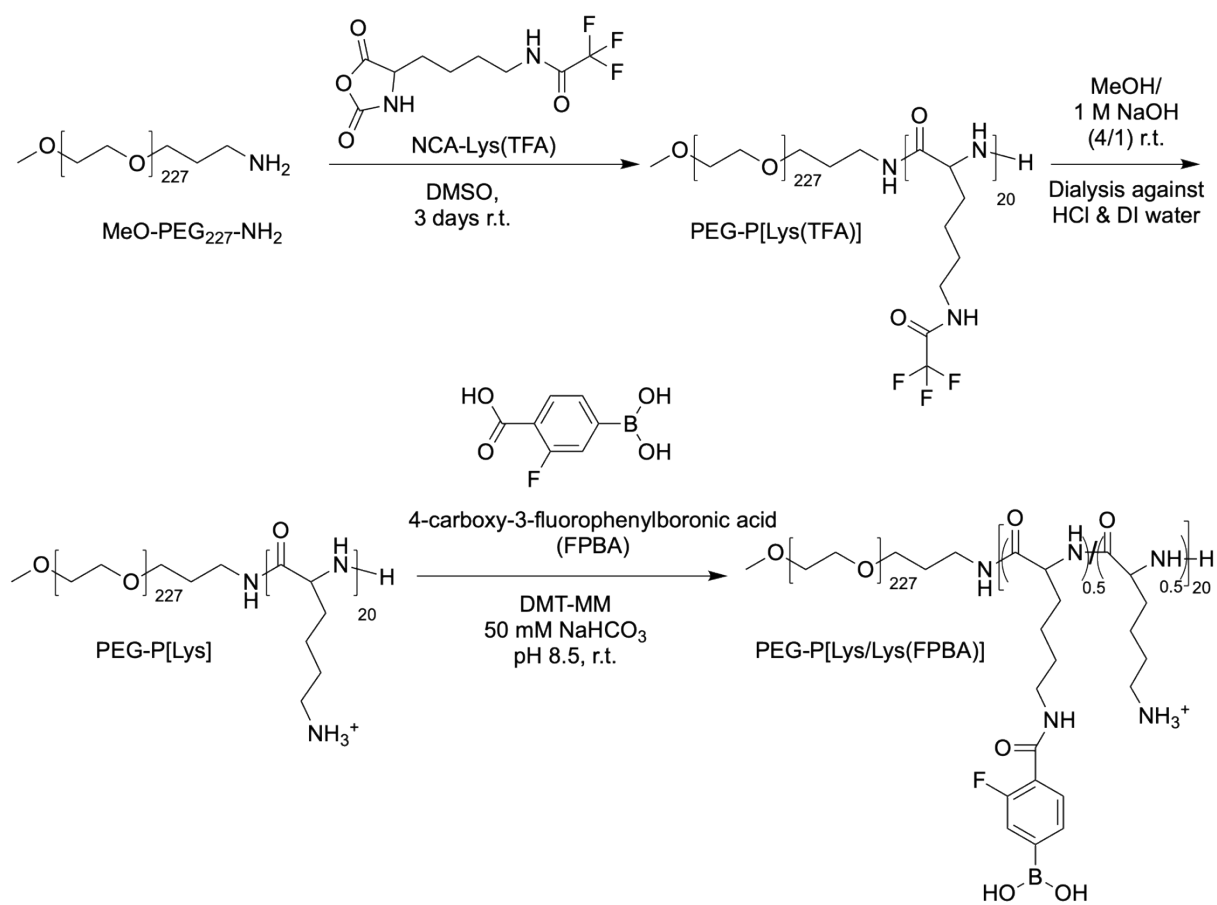

2  
3 **Scheme S1.** Synthetic scheme for PEG-PLys(FPBA)

4

5

6

1 **Supplementary Figures:**

2

3

4

5

6

7

8

9

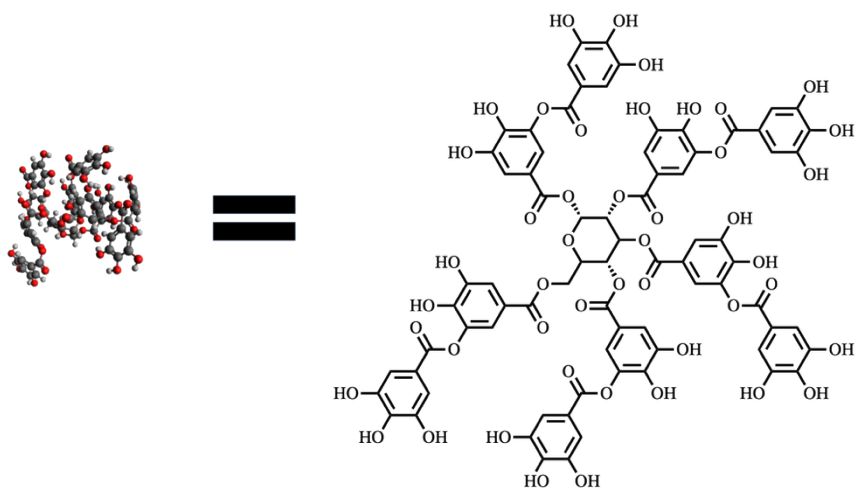

10 **Figure S1.** Representative chemical structure of tannic acids (TA)

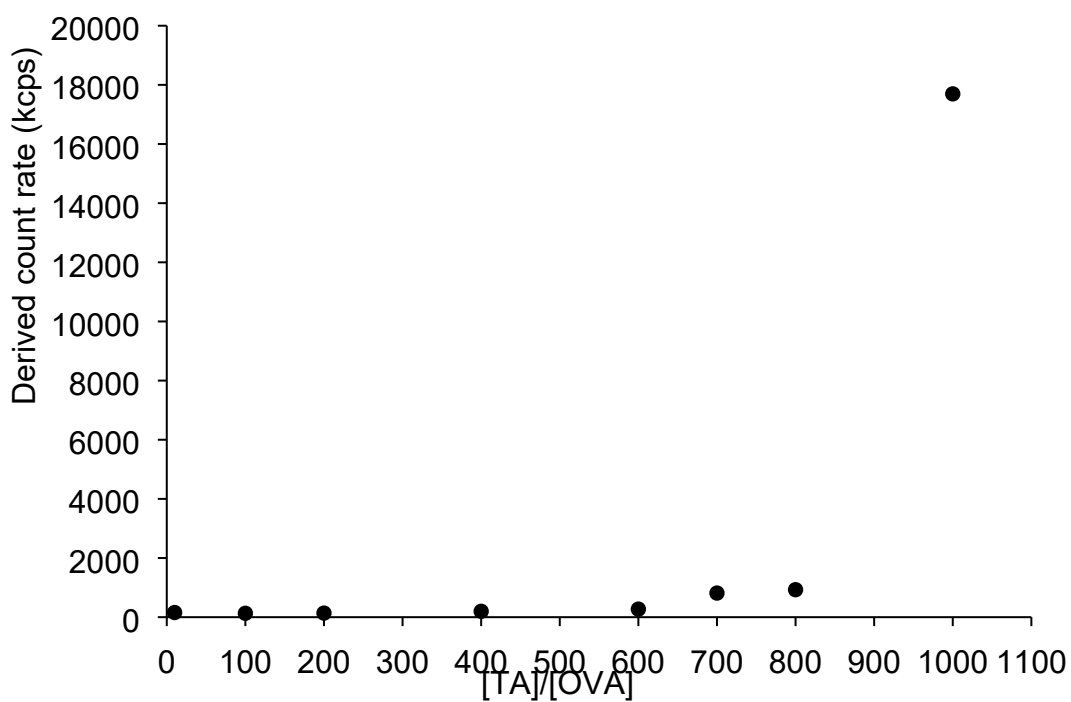

11

12 **Figure S2.** Turbidity measurement by light scattering analysis. OVA concentration, 1.0 mg  
13 mL<sup>-1</sup> (1.1 μM).

14

15

16

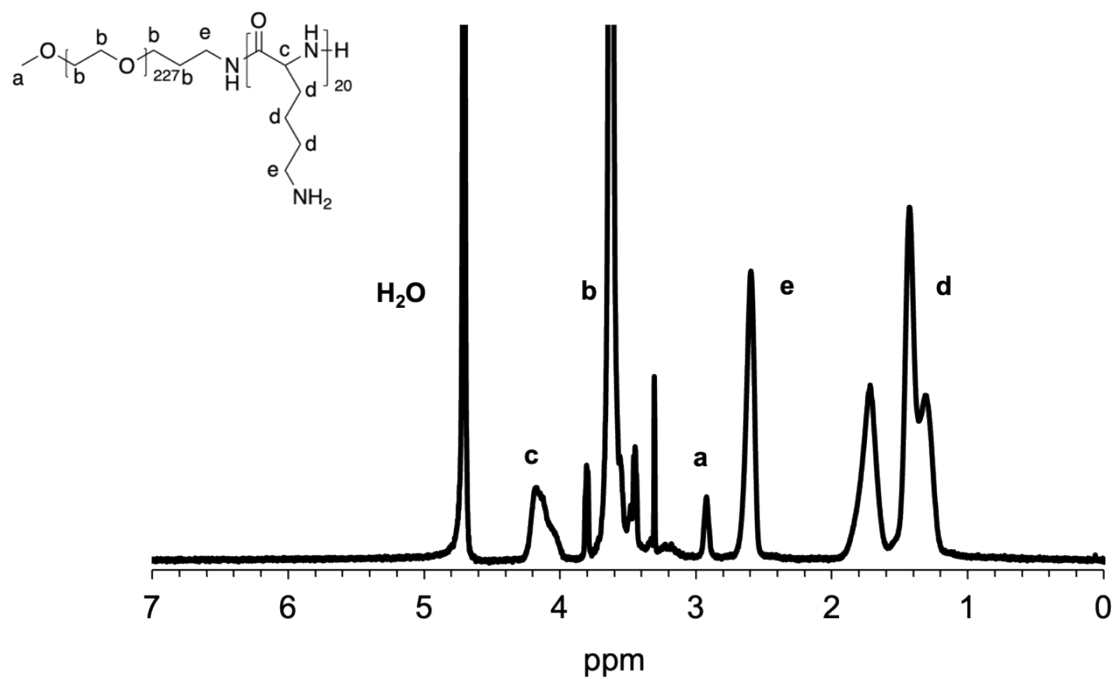

1  
2 **Figure S3.**  $^1\text{H}$  NMR spectrum of PEG-PLys (solvent:  $\text{D}_2\text{O}$ ).

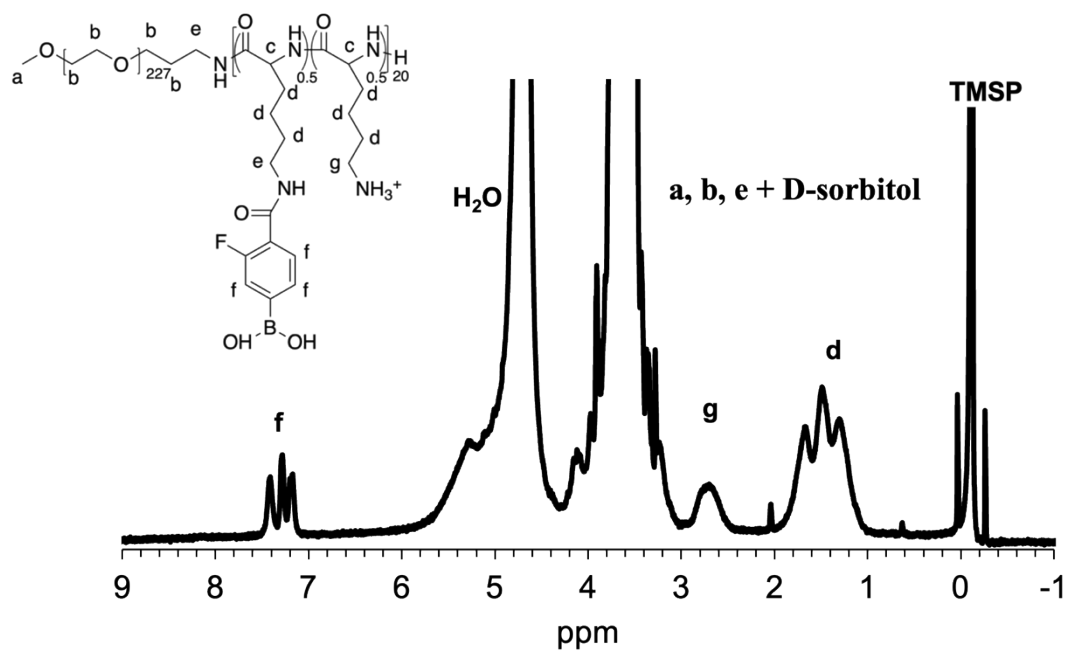

3 **Figure S4.**  $^1\text{H}$  NMR spectrum of PEG-PLys(FPBA) (solvent:  $\text{D}_2\text{O}$  with 5% NaODaq and 20  
4  $\text{mg mL}^{-1}$  of D-sorbitol).

5

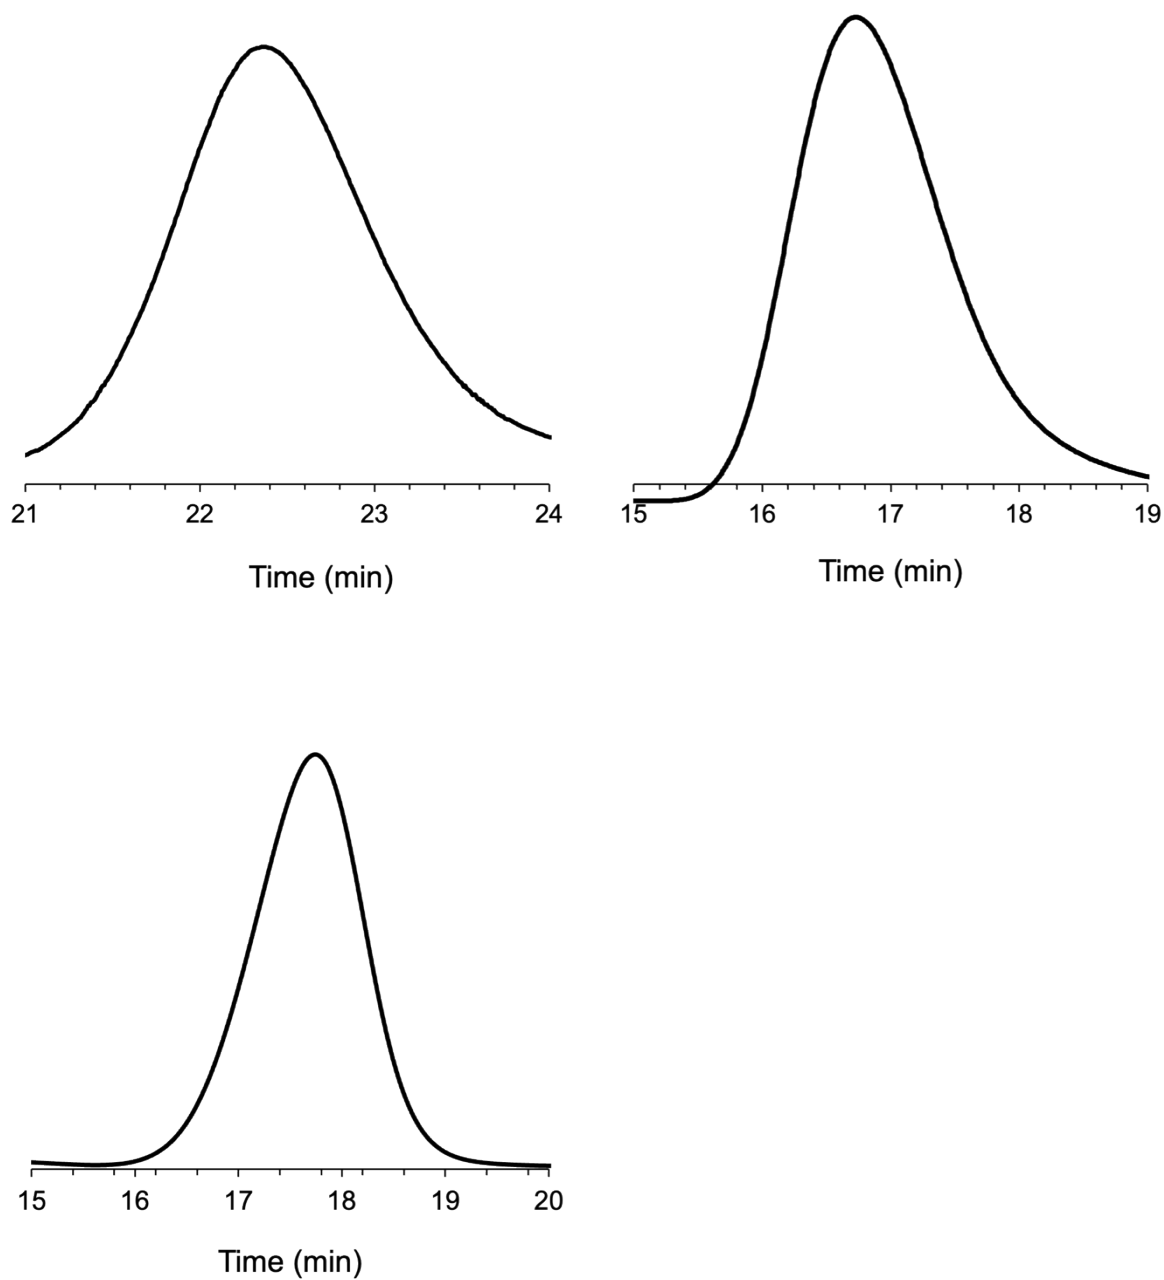

1

2 **Figure S5. GPC charts.** (a) PEG-PLys(TFA) (column: TSKgel superAW3000 and  
 3 superAW4000, Eluent: NMP containing 50 mM LiBr, Flow rate: 0.2 mL min<sup>-1</sup>, 40°C, calibrated  
 4 against PEG standards. (b) PEG-PLys (column: Superdex 200 Increase 10/300 GL, Eluent: 10  
 5 mM HEPES with 150 mM NaCl, Flow rate: 0.75 mL min<sup>-1</sup>, room temperature. (c) PEG-  
 6 PLys(FPBA) (column: Superdex 200 Increase 10/300 GL, Eluent: 10 mM HEPES with 150  
 7 mM NaCl, 500 mM D-sorbitol, Flow rate: 0.75 mL min<sup>-1</sup>, room temperature.

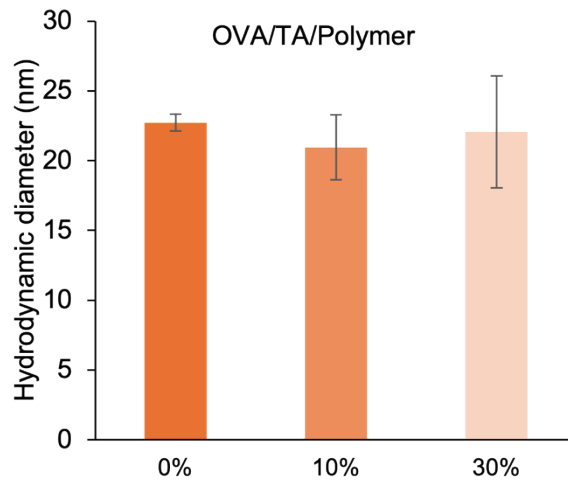

1

2 **Figure S6. Serum stability of OVA ternary complex.** The hydrodynamic diameter was  
 3 measured by FCS in D-PBS(-) containing FBS with 0, 10, and 30 vol%. Data are presented as  
 4 mean  $\pm$  SD (n = 10).

5

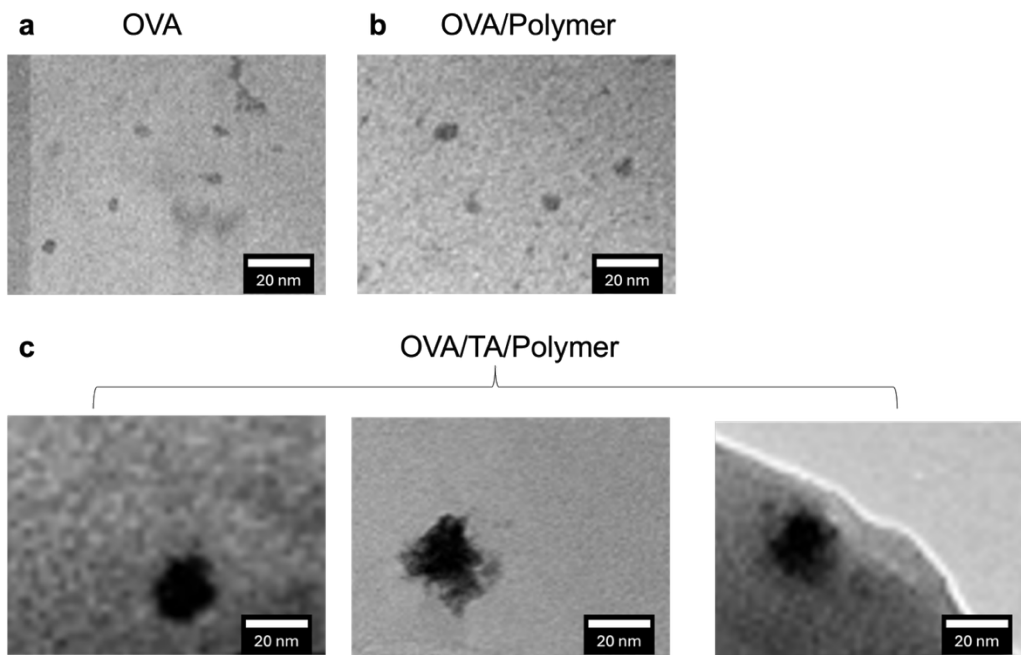

6 **Figure S7. Representative TEM images of (a) OVA, (b) OVA/Polymer, and (c)**  
 7 **OVA/TA/Polymer ternary complex.** Scale bar: 20 nm.

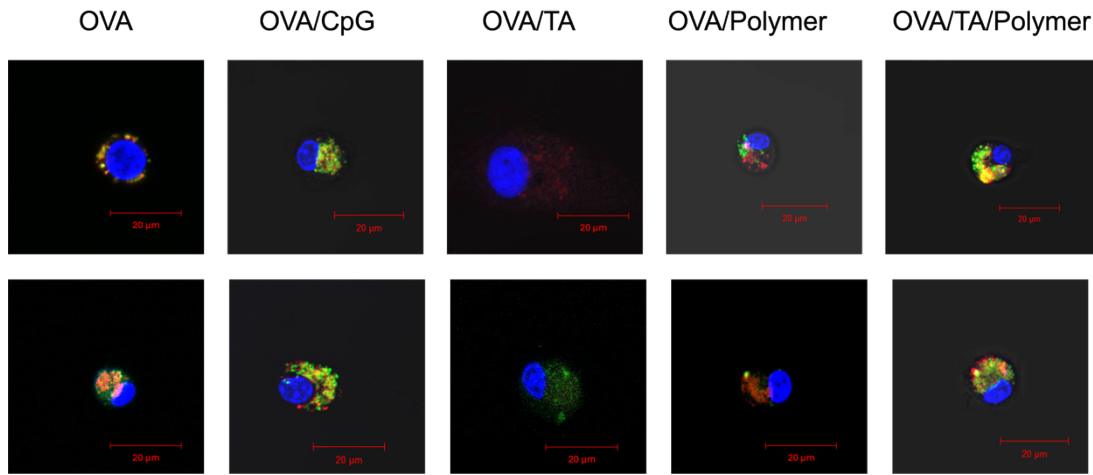

1

2 **Figure S8.** Additional CLSM images of BMDCs following incubation with each treatment  
 3 group. Blue: nuclei (Hoechst 33342); Green: OVA; Red: late endosomes/lysosomes  
 4 (LysoTracker Red). Scale bar = 20  $\mu\text{m}$ .

5

6

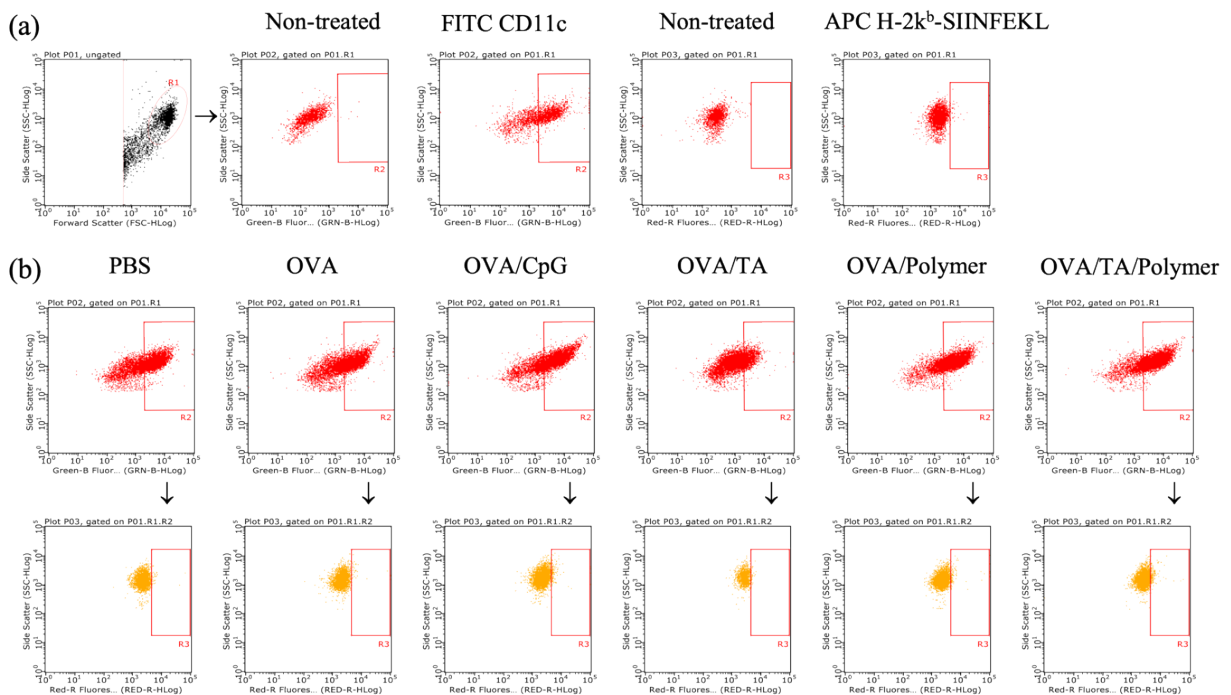

7

8 **Figure S9.** *In vitro* analysis of H-2k<sup>b</sup>-SIINFEKL<sup>+</sup> CD11c<sup>+</sup> BMDCs following 24 hours  
 9 incubation with OVA samples. (a) Gating strategy. (b) Representative plots showing H-2k<sup>b</sup>-  
 10 SIINFEKL<sup>+</sup> CD11c<sup>+</sup> cell populations in BMDCs in each sample.

1

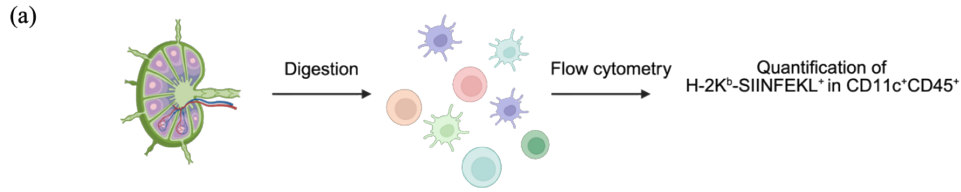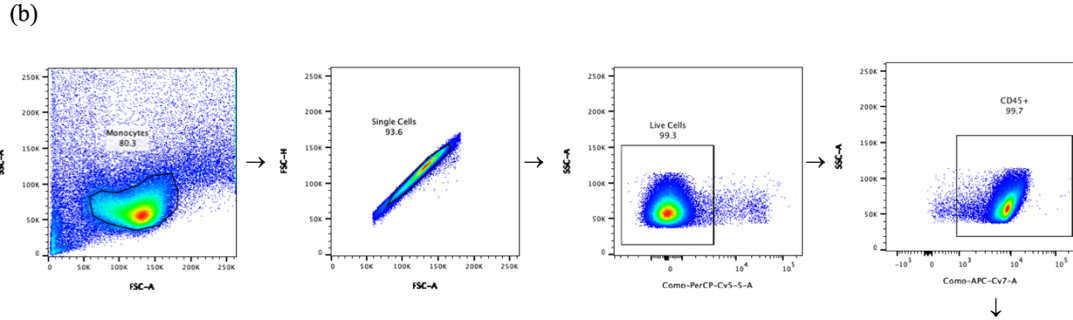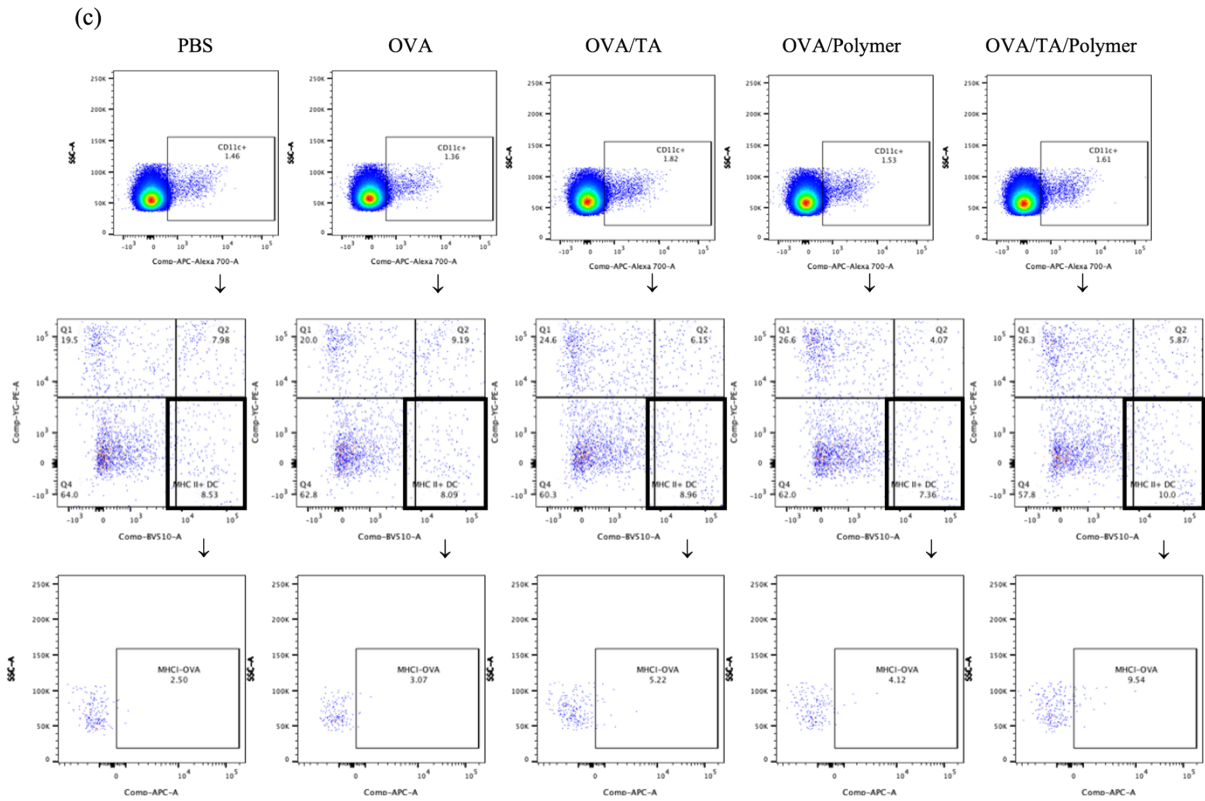

2

3 **Figure S10. *In vivo* gating strategy for H-2k<sup>b</sup>-SIINFEKL<sup>+</sup> CD11c<sup>+</sup> DCs in iLNs.** OVA  
 4 samples were injected s.c. on days 0 and 7. On day 14, iLNs were harvested for analysis. (a)  
 5 Antigen-presentation study design. (b) Gating strategy for CD45<sup>+</sup> cells. (c) Representative plots  
 6 of H-2k<sup>b</sup>-SIINFEKL<sup>+</sup> CD11c<sup>+</sup> DCs from CD45<sup>+</sup> cells.

7

8

9

10

(a)

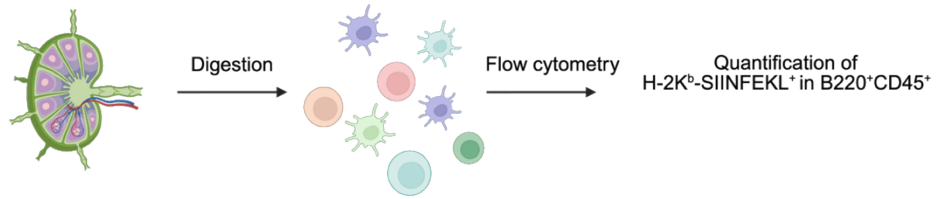

(b)

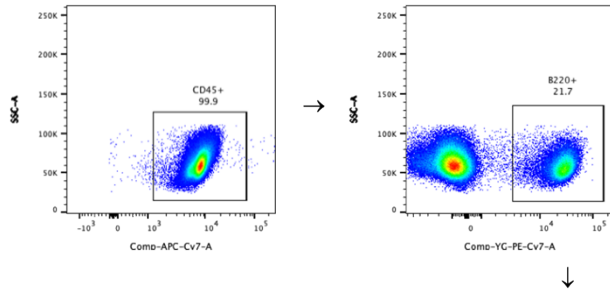

(c)

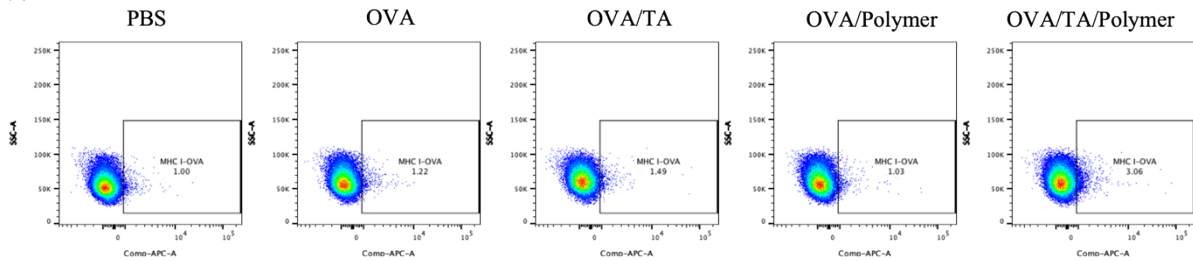

1

2 **Figure S11. *In vivo* gating strategy for H-2k<sup>b</sup>-SIINFEKL<sup>+</sup> B220<sup>+</sup> antigen presenting B cells**  
3 **in iLNs. OVA samples were injected s.c. on days 0 and 7. On day 14, iLNs were harvested for**  
4 **analysis. (a) Antigen-presentation study design. (b) Gating strategy for CD45<sup>+</sup> cells. (c)**  
5 **Representative plots of H-2k<sup>b</sup>-SIINFEKL<sup>+</sup> B220<sup>+</sup> B cells from CD45<sup>+</sup> cells.**

6

7

8

9

10

11

12

13

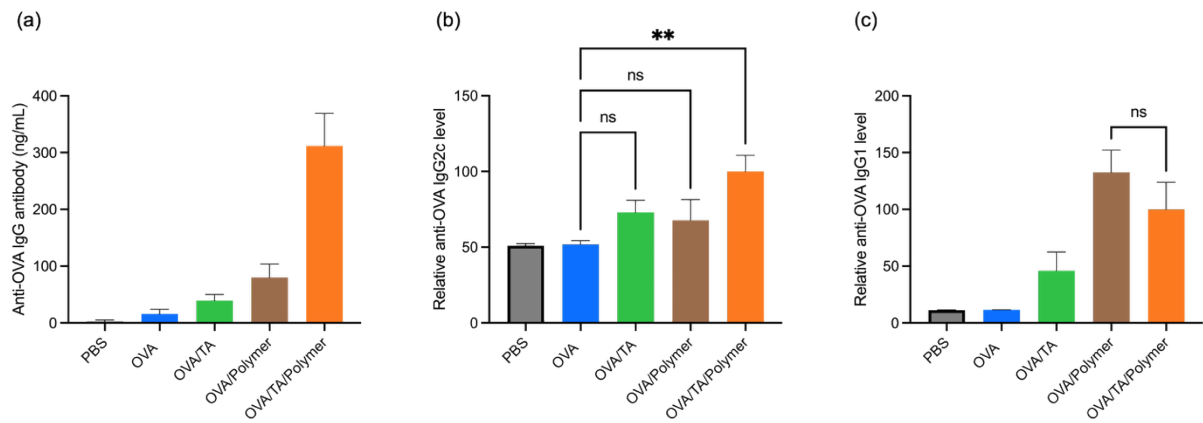

1  
2 **Figure S12. Serum anti-OVA antibody levels in each treatment group.** OVA samples were  
3 injected s.c. on days 0 and 7. On day 14, whole blood was collected, serum was isolated and  
4 antibody levels were quantified by ELISA (OVA: 10  $\mu\text{g}$  per mouse;  $n = 4$  mice). Serum anti-  
5 OVA (a) IgG concentration ( $\text{ng mL}^{-1}$ ). Relative serum anti-OVA (b) IgG2c and (c) IgG1  
6 antibody levels were normalized to the OVA/TA/Polymer group (set to 100). The results are  
7 expressed as mean  $\pm$  SEM. Statistical significance was determined by ANOVA with Tukey's  
8 multiple comparison test.

9

10

11

12

13

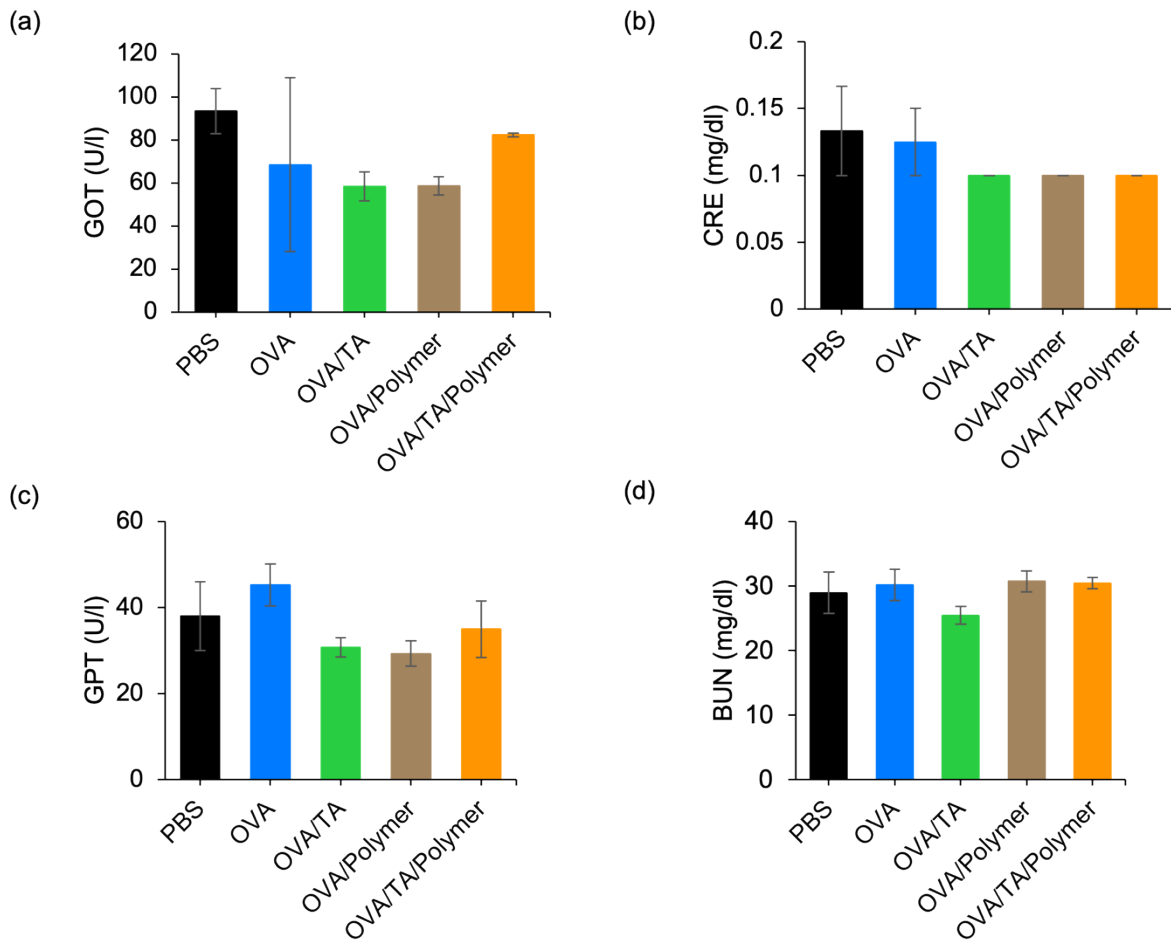

1

2 **Figure S13. Blood parameters.** Whole blood was collected 48 hours after s.c. injection of  
 3 OVA samples (OVA: 10  $\mu$ g per mouse; n = 4 mice). Biochemical parameters were evaluated,  
 4 including (a) GOT, (b) CRE, (c) GPT and (d) BUN. GOT; glutamic oxaloacetic transaminase,  
 5 CRE; creatinine, GPT; glutamic pyruvic transaminase, BUN; blood urea nitrogen. The results  
 6 are expressed as mean  $\pm$  SEM.

7

8

9

10

11

12

13

14

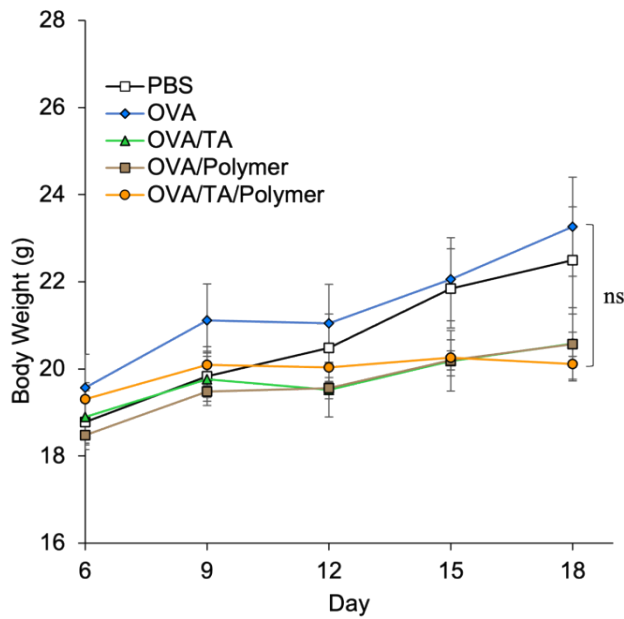

1

2 **Figure S14. Body weight monitoring in the E.G7-OVA prophylactic model.** OVA samples  
 3 were injected s.c. on days 0 and 7, followed by an E.G7-OVA tumor challenge on day 14. Body  
 4 weight was monitored over time (OVA: 10  $\mu$ g per mouse; n = 5 mice). The results are expressed  
 5 as mean  $\pm$  SEM. Statistical significance was determined by ANOVA with Tukey's multiple  
 6 comparison test.

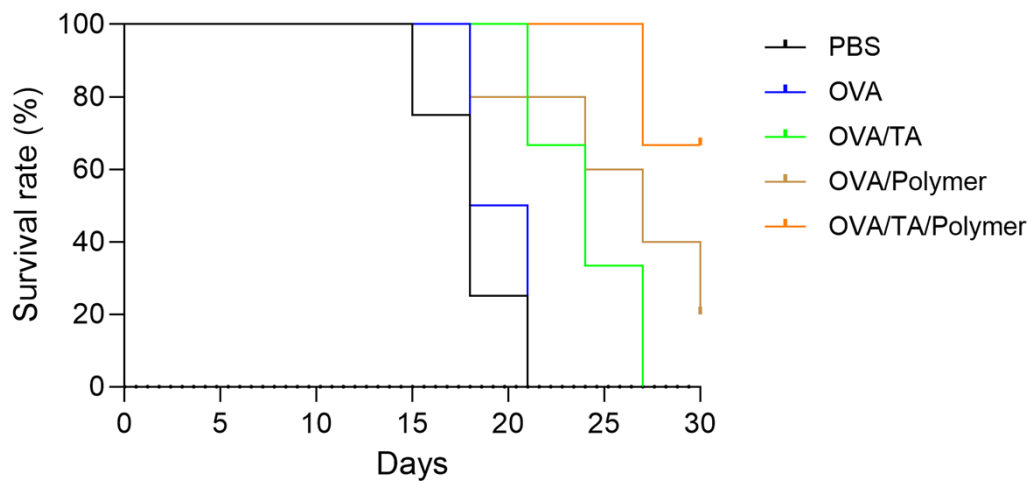

7

8 **Figure S15. Kaplan-Meier survival curves of the E.G7-OVA prophylactic model.** Survival  
 9 was determined as the time until tumor reached 3000 mm<sup>3</sup>. Data were plotted and analyzed  
 10 using GraphPad Prism 10.0.

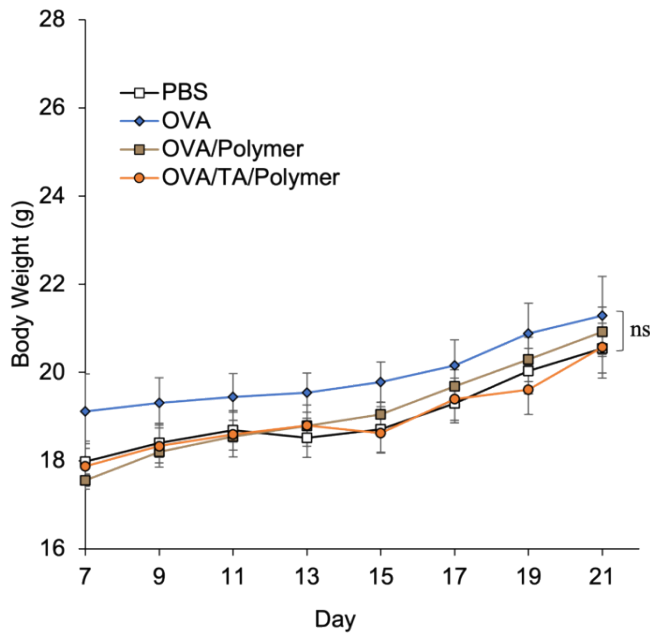

1

2 **Figure S16. Body weight monitoring in the E.G7-OVA therapeutic model.** Mice were  
 3 inoculated with E.G7-OVA tumors on day 0 and injected s.c. with OVA samples on days 7, 11,  
 4 15 and 19. Body weight was monitored over time (OVA: 20  $\mu$ g per mouse; n = 6 mice). The  
 5 results are expressed as mean  $\pm$  SEM. Statistical significance was determined by ANOVA with

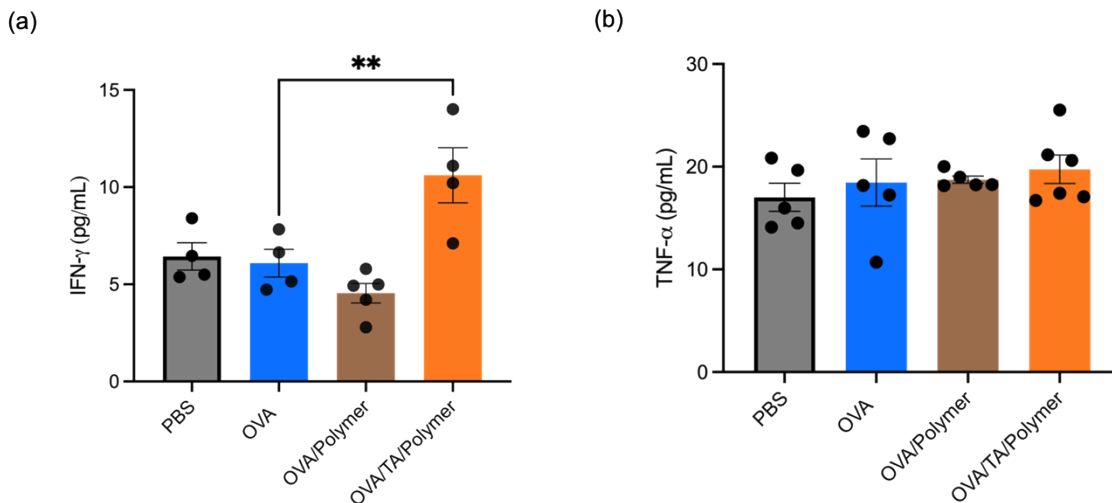

6 Tukey's multiple comparison test.

7 **Figure S17. Cytokine expression in tumor tissue from the E.G7-OVA therapeutic model.**  
 8 Tumors were harvested and analyzed by ELISA for (a) IFN- $\gamma$  and (b) TNF- $\alpha$  expression (OVA:  
 9 20  $\mu$ g per mouse; n = 4 or 5 mice). Data are presented as mean  $\pm$  SEM. Statistical significance  
 10 was determined by ANOVA with Tukey's multiple comparison test.

11

12
